# Supplementary material
Source: publisher site journal article supplement (https://www.dovepress.com/article/441738)
Supplement: Supplementary file 1 [file get_supplementary_file.php]

# Supplementary Material

Effects of a remote multimodal intervention involving diet, walking program, and breathing exercise on quality of life among newly diagnosed people with multiple sclerosis: a quasiexperimental non-inferiority pilot study

**Solange M. Saxby,1 Farnoosh Shemirani,1 Landon J. Crippes,1 Mary A. Ehlinger,1 Lisa Brooks,1 Babita Bisht,1 Tyler J. Titcomb,1 Linda M. Rubenstein,2 Patrick Ten Eyck,3 Karin F. Hoth,4 Christine Gill,5 John Kamholz,5 Linda G. Snetselaar,2,† Terry L. Wahls1,†,***

1 Department of Internal Medicine, University of Iowa, Iowa City, IA, USA; 2 Department of Epidemiology, University of Iowa, Iowa City, IA, USA; 3 Institute for Clinical and Translational Science, University of Iowa, Iowa City, IA, USA; 4 Department of Psychiatry and the Iowa Neuroscience Institute, University of Iowa, Iowa City, IA, USA; 5 Department of Neurology, University of Iowa Hospital and Clinics, Iowa City, IA

† Equal contribution and senior authorship

*** Correspondence:** Corresponding Author: [Terry-Wahls@uiowa.edu](mailto:Terry-Wahls@uiowa.edu)

| **Table S1.** Exclusion criteria for health behaviors (HB) intervention and standard of care (SOC) groups* | | |
| --- | --- | --- |
| **Exclusion Criteria** | **Health Behaviors** | **Standard of Care** |
| No MS | - | 3 |
| Age <18 or >55 | 102 | 94 |
| CIS or RRMS diagnosis > 12 months | 609 | 238 |
| Not allow Neurologist to verify diagnosis | 27 | - |
| Not allow medical records shared | 16 | 25 |
| Coumadin/Insulin Prescription | 10 | 14 |
| Out of recruitment area (not in lower 48 US) | 166 | 144 |
| Cancer treatment | 3 | 5 |
| Kidney stones | 30 | 35 |
| Cannot or unwilling to shop/prepare meals | 9 | 16 |
| Does not have a support person | 76 | 102 |
| Diet related - will not eat more vegetables | 3 | 1 |
| Diet related - will not eliminate gluten/dairy/eggs | 10 | - |
| Unable to walk 25 feet | 39 | 56 |
| Lifestyle related - no daily exercise | 1 | - |
| Participation in another study | 18 | 22 |
| Psychiatric disease | 5 | 6 |
| Eating disorder | 8 | - |
| Pregnant | 26 | 22 |
| Medical contraindication or clinically significant condition | 1 | - |
| Incomplete screen | 449 | 107 |
| Declined medication treatment | 163 | n/a |
| MS medication (current) | 312 | n/a |
| DMT History | 152 | n/a |
| Abbreviations: MS, multiple sclerosis; CIS, clinically isolated syndrome; DMT, disease-modifying therapies; n/a, not applicable.  *Reasons for ineligibility or exclusion may not add up to the value of excluded participants because some participants were excluded for multiple reasons. | | |

| **Table S2**. Disease-modifying therapies self-reported at baseline and month 12 in the standard of care (SOC) group | | |
| --- | --- | --- |
| Participant ID | Baseline DMT | 12-month DMT Status |
| 1 | Tecfidera | reduced dose |
| 2 | Tecfidera | reduced dose |
| 3 | n/r | n/r |
| 4 | n/r | n/r |
| 5 | n/r | n/r |
| 6 | Ocrevus | Gilenya |
| 7 | n/r | n/r |
| 8 | n/r | n/r |
| 9 | n/r | n/r |
| 10 | n/r | n/r |
| 11 | n/r | n/r |
| 42 | n/r | n/r |
| 43 | Zeposia | Ocrevus |
| 92 | Aubagio | Ocrevus |
| 121 | n/r | n/r |
| n/r = not reported by participant. | | |

**Table S3**. Adverse events self-reported at month 12 in the health behaviors (HB) intervention and standard of care (SOC) groupsa

|  | **Health Behaviors** | **Standard of Care** | **p-valueb** |
| --- | --- | --- | --- |
| Relapse Rate (%) | 4 (16.7%) | 1 (7.1%) | 0.63 |
| COVID-19 | 9 (37.5%) | 1 (7.7%) | 0.07 |

a Data are shown as n (%).

b Significance determined using Pearson’s chi-square test for categorical variables.

| **Table S4.** Self-reported adverse events from health behaviors (HB) intervention group participants | | |
| --- | --- | --- |
| **Participant ID** | **Reported Date** | **Adverse Event** |
| HB3 | 04/27/2021 | Dysuria |
| HB3 | 10/24/2020 | Zinc deficiency |
| HB11 | 09/07/2021 | Paresthesia - Right lower leg |
| HB11 | 12/21/2021 | Vision Change |
| HB11 | 12/10/2020 | Weight Loss |
| HB28 | 04/10/2021 | Ear and Labyrinth Disorders - Ear pressure |
| HB28 | 10/06/2020 | Paresthesia - Fingers |
| HB28 | 07/10/2021 | Paresthesia - Right Hand |
| HB28 | 09/09/2021 | Staph Infection - Skin |
| HB36 | 11/24/2020 | Abnormal Pap Smear |
| HB36 | 04/16/2021 | Conjunctivitis (Pink Eye) |
| HB36 | 02/09/2021 | Eye pain / Brain Fog |
| HB36 | 11/24/2020 | Human Papillomavirus (HPV) |
| HB36 | 03/18/2021 | Urinary Tract Infection |
| HB36 | 03/05/2021 | Vitamin D Deficiency |
| HB43 | 03/02/2021 | Skin and subcutaneous tissue disorders - Other |
| HB43 | 04/02/2021 | Weight Loss |
| HB43 | 05/10/2021 | Weight Loss |
| HB51 | 11/28/2020 | Vertigo |
| HB132 | 07/10/2021 | Dysesthesia |
| HB132 | 05/10/2021 | Eye Irritation |
| HB152 | 03/25/2021 | Anxiety - Worsening |
| HB152 | 02/08/2021 | Breast Implant Illness |
| HB152 | 01/10/2021 | Muscle Cramps |
| HB206 | 04/05/2021 | Paresthesia - Facial |
| HB214 | 04/10/2021 | Irregular menstrual cycle |
| HB315 | 07/12/2021 | Car accident |
| HB337 | 01/01/2021 | Myelitis (Lhermitte sign) |
| HB337 | 06/17/2021 | Upper respiratory infection |
| HB399 | 06/24/2021 | Hand fracture |
| HB399 | 12/17/2020 | Optic nerve disorder |
| HB399 | 10/21/2021 | Plantar fasciitis |
| HB399 | 10/21/2021 | Swollen armpit |
| HB440 | 05/10/2021 | Vertigo |
| HB552 | 02/24/2021 | Dysuria |
| HB552 | 05/19/2021 | Uterine pain & fibroid |
| HB559 | 07/11/2021 | Constipation |
| HB559 | 02/24/2021 | Surgical procedures - Other, cosmetic |
| HB609 | 04/24/2021 | Paresthesia - Right hand |
| HB661 | 06/10/2021 | Dry skin |
| HB661 | 10/10/2021 | Paresthesia |
| HB661 | 02/10/2021 | Vertigo |
| HB661 | 03/10/2021 | Vertigo |
| HB661 | 05/10/2021 | Vertigo |
| HB740 | 01/18/2021 | Anxiety & Depression - Worsening |
| HB740 | 01/18/2021 | Herpes Simplex - Reactivation |
| HB740 | 01/18/2021 | Myalgic Encephalomyelitis / Chronic Fatigue Syndrome (ME/CFS) |
| HB775 | 04/06/2021 | Constipation |
| HB775 | 01/26/2021 | Pain in extremity |
| HB1054 | 06/14/2021 | Paresthesia |
| HB1067 | 08/17/2021 | Anxiety - Worsening |
| HB1067 | 01/05/2021 | Paresthesia |
| HB1162 | 02/17/2021 | Weight Loss |
| HB1262 | 08/10/2021 | Paresthesia |

| **Table S5.** Self-reported adverse events from standard of care (SOC) group participants | | |
| --- | --- | --- |
| **Participant ID** | **Reported Date** | **Adverse Event** |
| SOC3 | 10/30/2021 | Dysuria |
| SOC4 | 04/02/2021 | MS relapse |
| SOC6 | 06/29/2021 | Low white blood cell (WBC) counts |
| SOC7 | 10/25/2021 | Ovarian cyst |
| SOC7 | 10/25/2021 | Calcium elevated |
| SOC7 | 10/25/2021 | Human Papillomavirus (HPV) - Recurrence |
| SOC7 | 10/25/2021 | Abnormal Pap smear |
| SOC8 | 04/01/2021 | Calcium elevated |
| SOC8 | 04/01/2021 | Vertigo |
| SOC10 | 06/29/2021 | High lymphocytes |
| SOC10 | 09/24/2021 | Painful glands in left armpit |
| SOC10 | 03/31/2021 | Sjogren’s Disease |
| SOC11 | 10/27/2021 | Ruptured ear drum |
| SOC42 | 12/15/2021 | Diarrhea |
| SOC42 | 09/14/2021 | Urinary tract infection |
| SOC42 | 09/14/2021 | Worsening hypertension |
| SOC43 | 09/14/2021 | Foot injury |
| SOC43 | 06/24/2021 | Osteopenia |
| SOC92 | 09/05/2021 | Lymphocytes decreased |
| SOC92 | 12/18/2021 | Low hemoglobin (HGB)/hematocrit (HCT) |
| SOC92 | 12/18/2021 | Low iron |
| SOC92 | 12/18/2021 | Irregular menstrual cycle |
| SOC92 | 07/8/2021 | Paresthesia - Hands and legs |

| **Table S6**. Outcome means for months 3, 6, and 9 for the health behaviors (HB) intervention and standard of care (SOC) groupsa | | | | | | | |
| --- | --- | --- | --- | --- | --- | --- | --- |
| **Outcomes** | **Health Behaviors (HB)** | | |  | **Standard of Care (SOC)** | | |
| **3** | **6** | **9** |  | **3** | **6** | **9** |
| MSQoL54 – Mental | 3.94 ± 0.12 | 4.08 ± 0.10* | 4.04 ± 0.12 |  | 4.20 ± 0.15 | 4.19 ± 0.14 | 4.37 ± 0.13* |
| MSQoL54 – Physical | 2.82 ± 0.04 | 2.83 ± 0.03 | 2.79 ± 0.03 |  | 2.81 ± 0.06 | 2.76 ± 0.07 | 2.82 ± 0.05 |
| IPAQ – MET total | 12961 ± 3367 | 11263 ± 2508 | 11181 ± 2659 |  | 11980 ± 2534 | 14948 ± 3100 | 12534 ± 3347 |
| IPAQ – Moderate MET | 10971 ± 3234 | 9427 ± 2285 | 8227 ± 1835 |  | 9360 ± 1966 | 12048 ± 2669* | 8178 ± 2292 |
| IPAQ – Vigorous MET | 1063 ± 411 | 1440 ± 623 | 2035 ± 1044 |  | 1920 ± 727 | 2240 ± 820 | 2695 ± 1556 |
| IPAQ – Walking MET | 926 ± 576 | 396 ± 150 | 919 ± 315 |  | 700 ± 373 | 660 ± 336 | 1660 ± 1002 |
| HADS – Anxiety | 7.75 ± 0.82 | 7.28 ± 0.75 | 7.72 ± 0.89 |  | 6.40 ± 0.97 | 7.20 ± 1.27 | 5.69 ± 0.80 |
| HADS – Depression | 4.32 ± 0.79 | 3.72 ±0.76 | 3.20 ± 0.70* |  | 3.07 ± 0.69 | 2.73 ± 0.79 | 3.31 ± 0.96 |
| FSS | 3.47 ± 0.29 | 3.49 ± 0.30 | 3.17 ± 0.32 |  | 3.82 ± 0.60 | 3.22 ± 0.50 | 3.78 ± 0.66 |
| Total MFIS | 29.5 ± 3.86 | 26.1 ± 3.24** | 24.8 ± 3.49** |  | 29.5 ± 6.68 | 6.68 ± 5.98 | 27.0 ± 6.90 |
| MFIS – Physical | 11.6 ± 1.57 | 9.72 ± 1.43 | 10.1 ± 1.68 |  | 11.5 ± 2.73 | 10.0 ± 2.71 | 9.15 ± 3.20 |
| MFIS – Cognitive | 15.7 ± 2.10 | 14.3 ± 1.85* | 12.8 ± 1.73** |  | 15.5 ± 3.95 | 14.5 ± 2.80 | 15.6 ± 3.23 |
| MFIS – Psychosocial | 2.25 ± 0.45 | 2.12 ± 0.31 | 1.96 ± 0.31 |  | 2.47 ± 0.73 | 0.73 ± 0.62 | 2.23 ± 0.86 |
| Total PDQ | 25.8 ± 2.75 | 22.8 ± 2.48** | 20.6 ± 3.13*** |  | 25.1 ± 4.63 | 24.5 ± 4.48 | 23.6 ± 5.00 |
| PDQ – Attention | 7.64 ± 0.81 | 7.08 ± 0.68** | 6.08 ± 0.89*** |  | 7.80 ± 1.28 | 7.20 ± 1.34 | 7.46 ± 1.47 |
| PDQ – Retromemory | 6.14 ± 0.78 | 5.12 ± 0.78* | 4.68 ± 0.90* |  | 6.00 ± 1.18 | 5.93 ±1.22 | 5.92 ± 1.49 |
| PDQ – Promemory | 5.25 ± 0.63 | 4.72 ± 0.59 | 4.76 ± 0.75 |  | 4.93 ± 0.96 | 5.20 ± 1.02 | 4.54 ± 0.86 |
| PDQ – Planning | 6.71 ± 0.78 | 5.92 ± 0.66 | 5.12 ± 0.77*** |  | 6.33 ± 1.49 | 6.20 ± 1.29 | 5.69 ± 1.47 |
| Abbreviations: FSS, fatigue severity scale; HADS, hospital anxiety and depression scare; IPAQ; international physical activity questionnaire; MSQOL54, multiple sclerosis quality of life 54 questionnaire; MFIS, modified fatigue impact scale; PDQ, perceived deficits questionnaire.  a All values shown in mean ± SEM.  Within-group statistical significance compared to baseline values indicated by * for (p ≤ 0.05), ** for (p ≤ 0.01), and *** for (p ≤ 0.001). | | | | | | | |
